# Supplementary material for: Granger causality analysis for calcium transients in neuronal networks, challenges and improvements
Source: eLife journal article supplement (doi:10.7554/elife.81279), 2023-02-07

False positive rate, BVGC

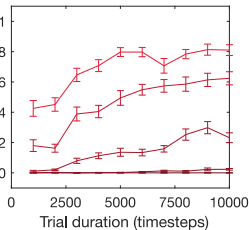

False negative rate, BVGC

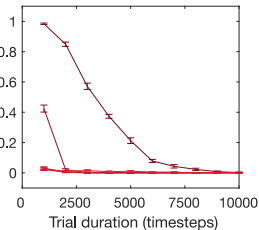

False positive rate, BVGC

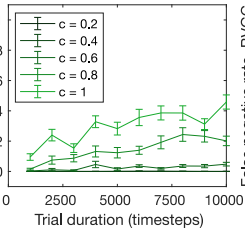

False negative rate, BVGC

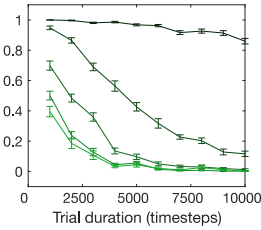

False positive rate, MVGC

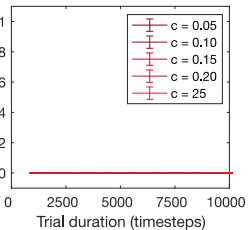

False negative rate, MVGC

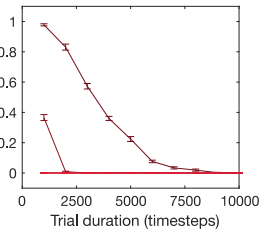

False positive rate, MVGC

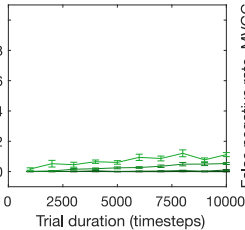

False negative rate, MVGC

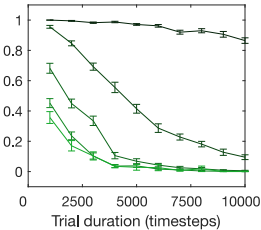

Supplement: supp [file elife-81279-supp-v1.zip]
