# Supplementary material for: Granger causality analysis for calcium transients in neuronal networks, challenges and improvements
Source: eLife journal article supplement (doi:10.7554/elife.81279), 2023-02-07

BVGC, original signal

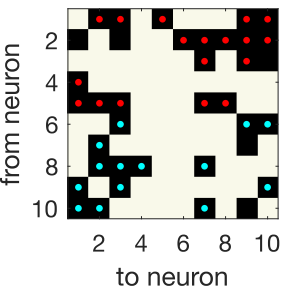

BVGC, redundant structure,  
neuron 1 = neuron 11

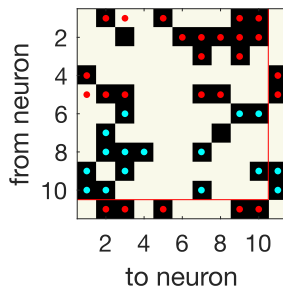

BVGC, redundant signal,  
neuron 1 = neuron 11

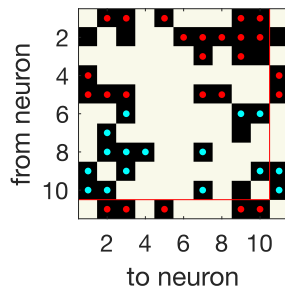

MVGC, original signal

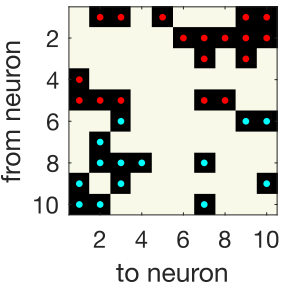

MVGC, redundant structure,  
neuron 1 = neuron 11

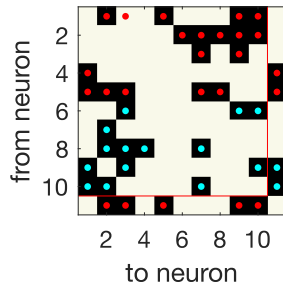

MVGC, redundant signal,  
neuron 1 = neuron 11

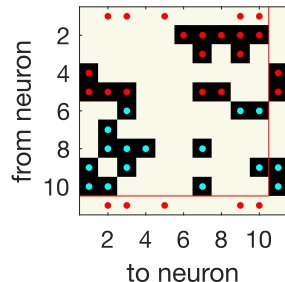

Supplement: supp [file elife-81279-supp-v1.zip]
