# Supplementary figures and images for: Granger causality analysis for calcium transients in neuronal networks, challenges and improvements
Source: eLife journal article supplement (doi:10.7554/elife.81279), 2023-02-07

A

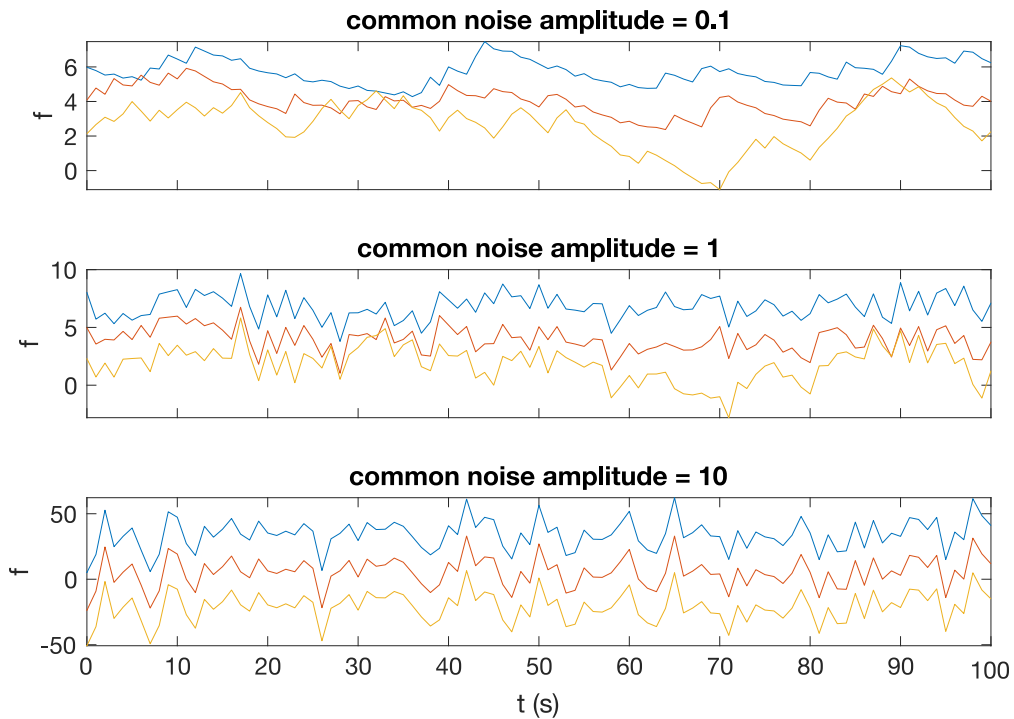

B

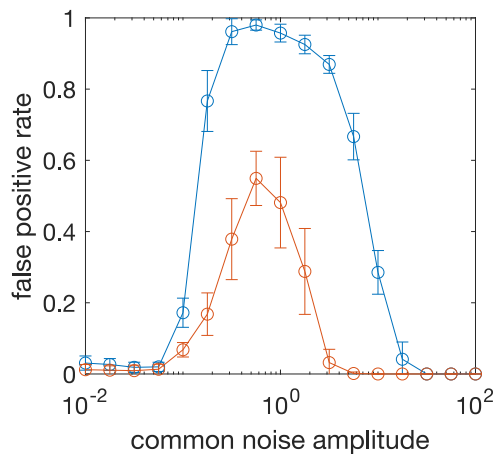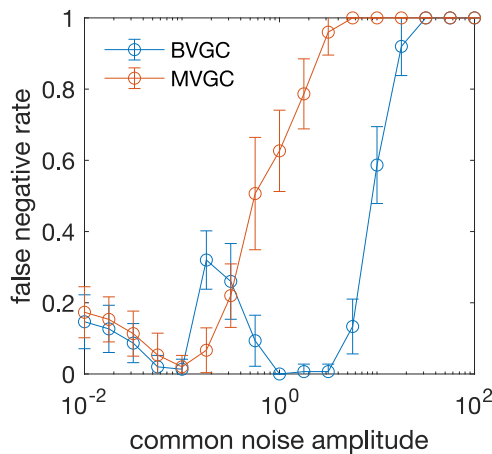

Supplement: supp [file elife-81279-supp-v1.zip]

# GLM-Calcium

**A**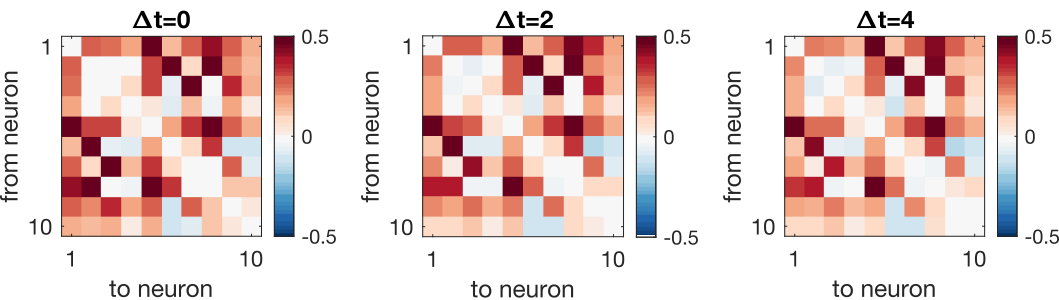**B**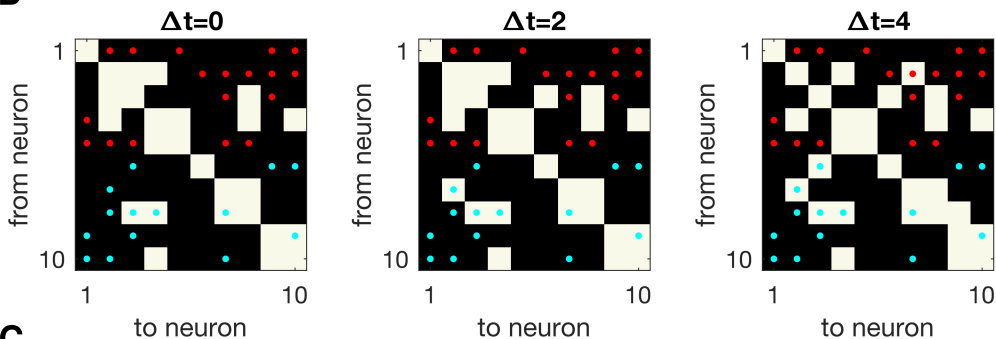**C**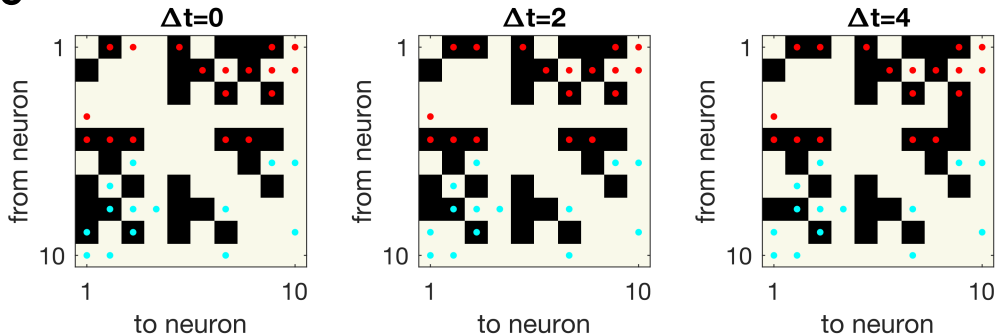

Supplement: supp [file elife-81279-supp-v1.zip]

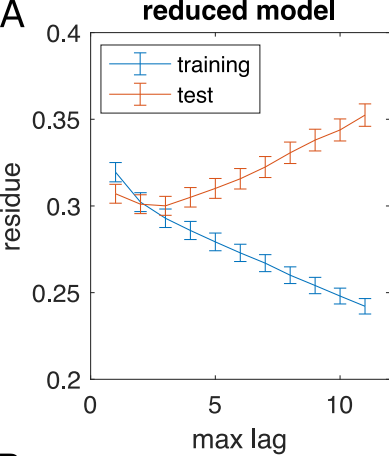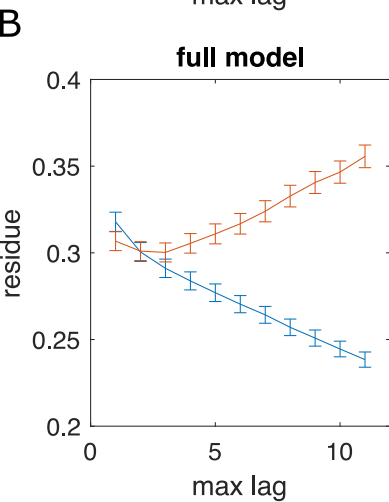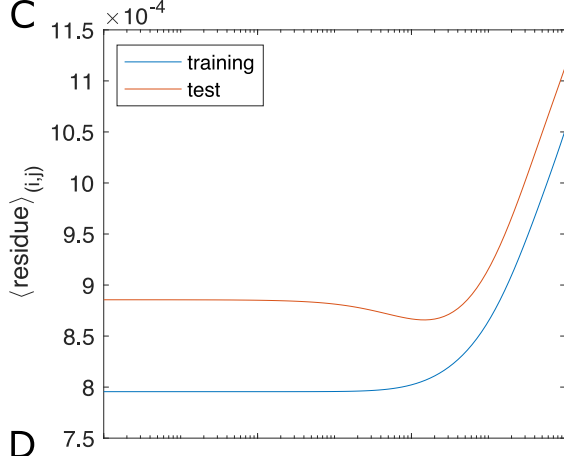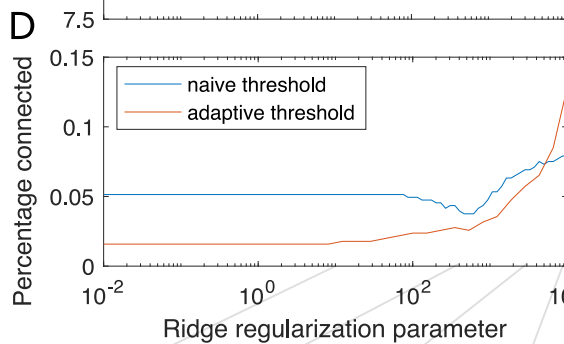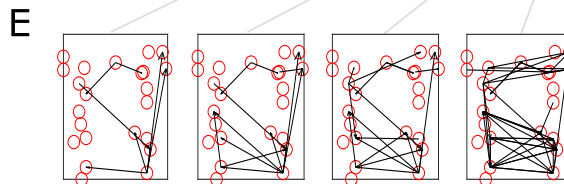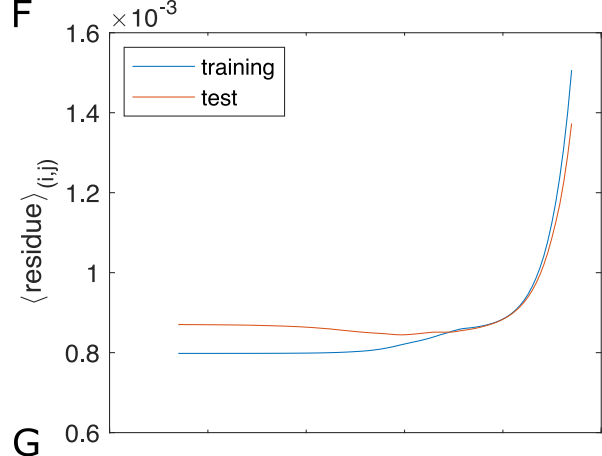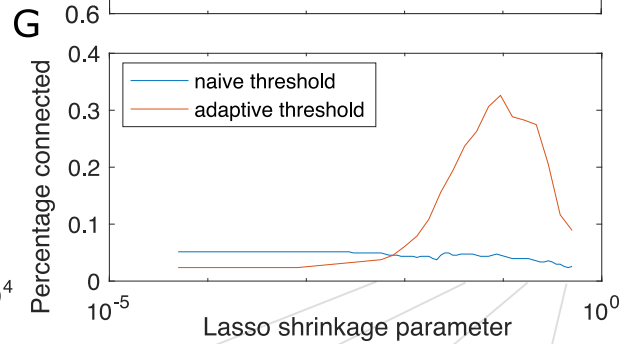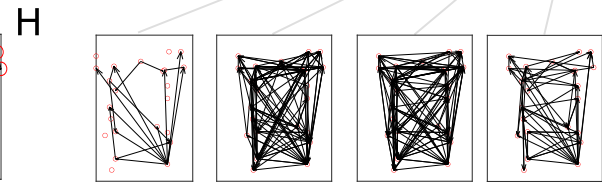

Supplement: supp [file elife-81279-supp-v1.zip]

**A****VAR**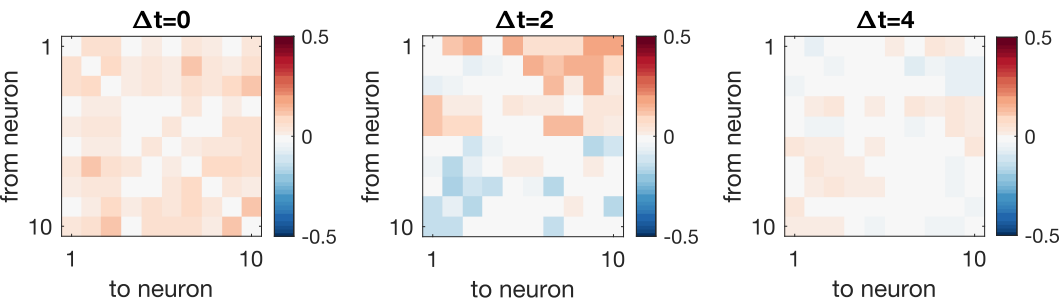**B**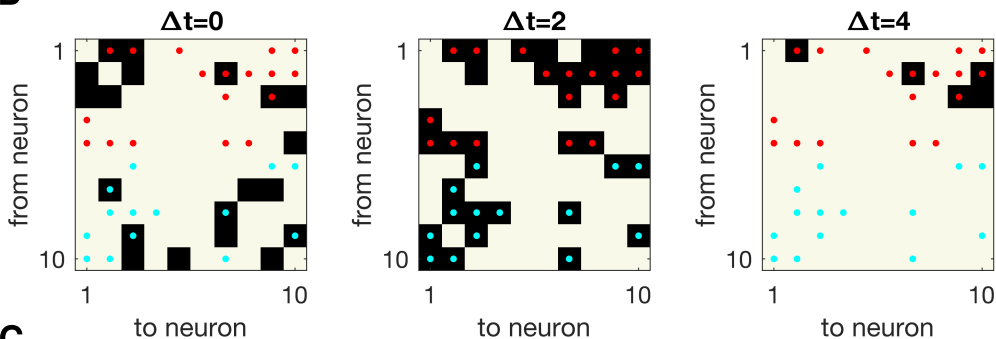**C**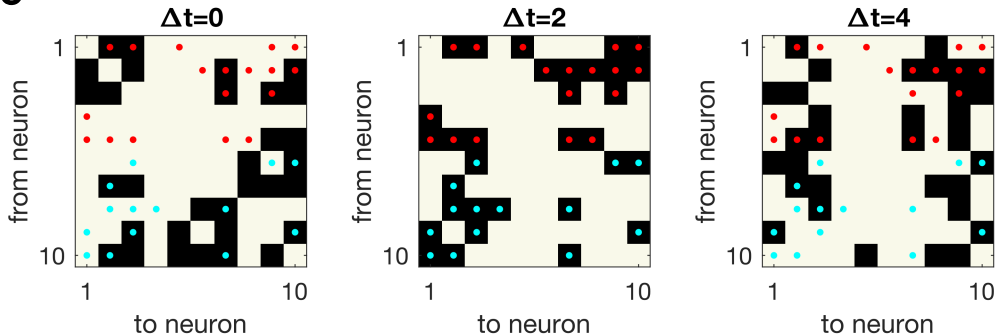

Supplement: supp [file elife-81279-supp-v1.zip]

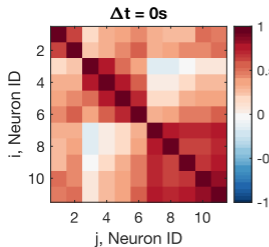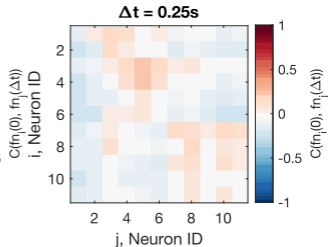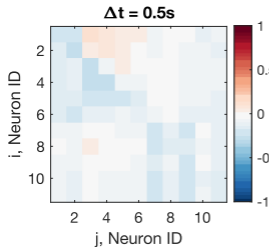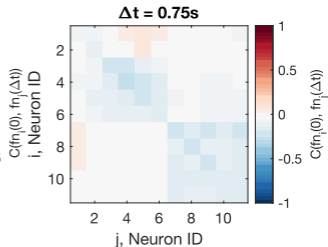

Supplement: supp [file elife-81279-supp-v1.zip]

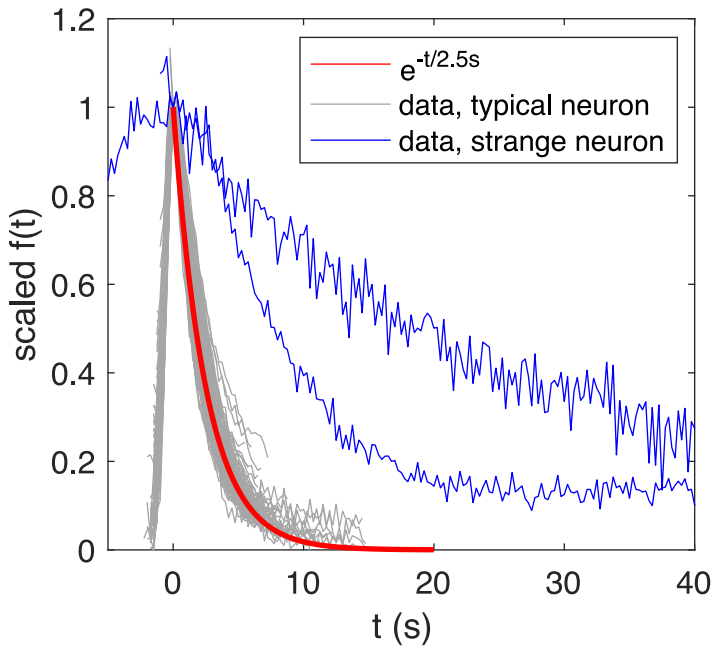

Supplement: supp [file elife-81279-supp-v1.zip]

**A****common noise amplitude = 0.001**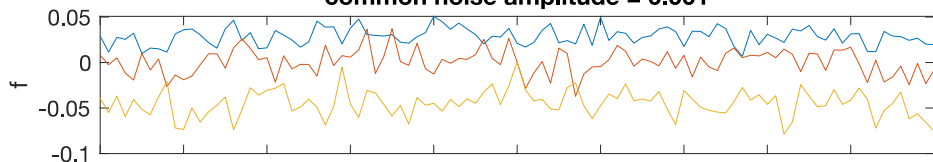**common noise amplitude = 0.01**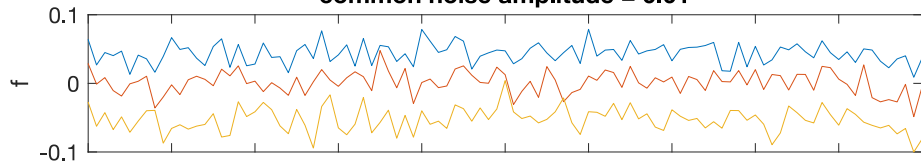**common noise amplitude = 0.1**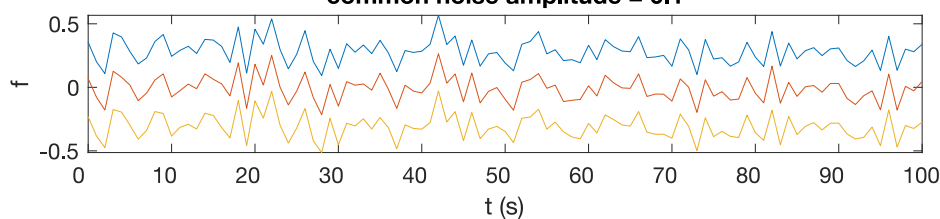**B**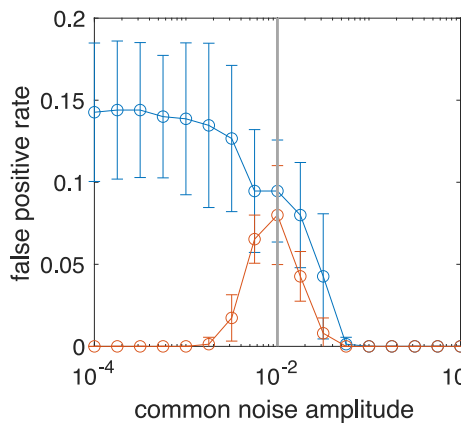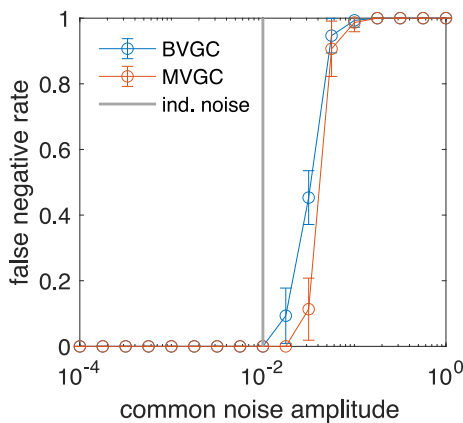

Supplement: supp [file elife-81279-supp-v1.zip]

Original  $\Delta f/f$ Smooth  $\Delta f/f$ 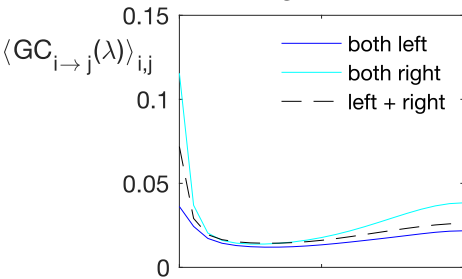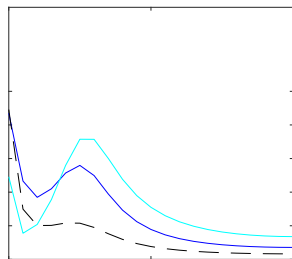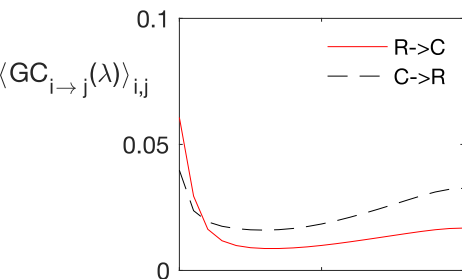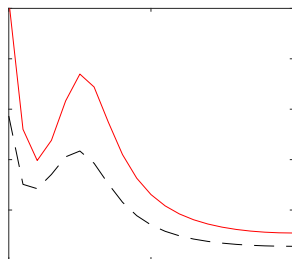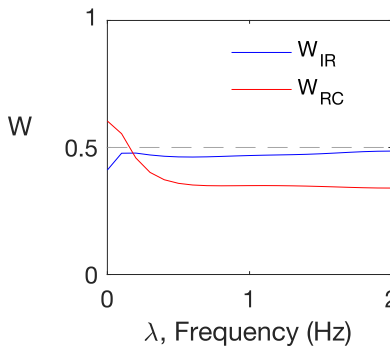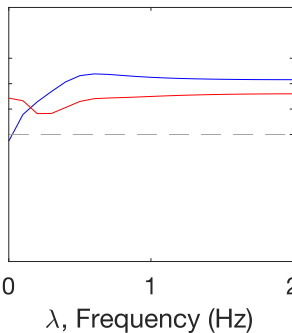

Supplement: supp [file elife-81279-supp-v1.zip]

**A****GLM**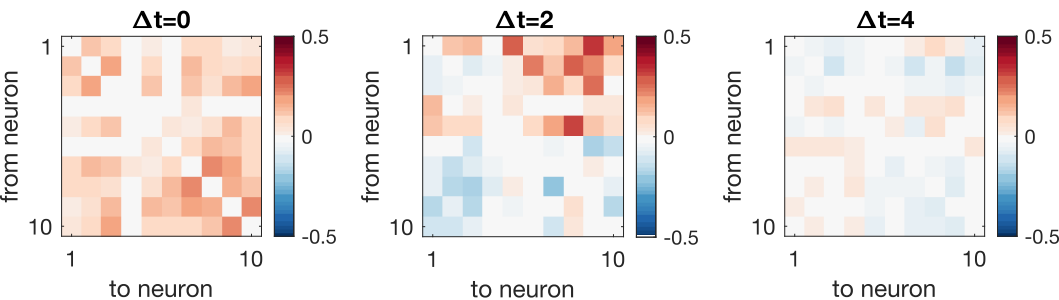**B**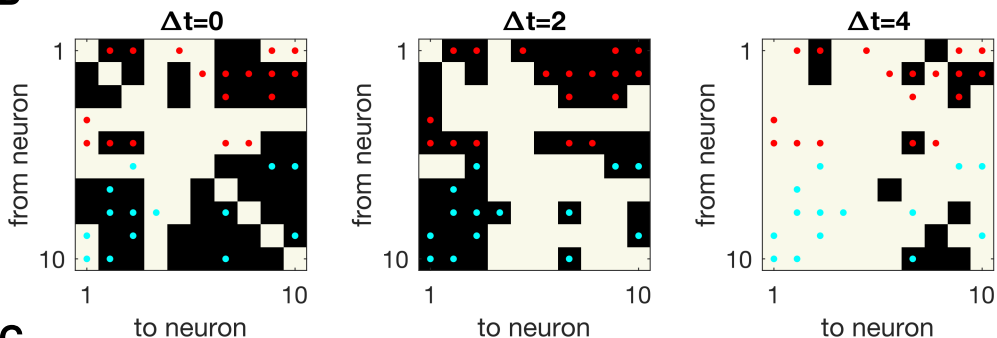**C**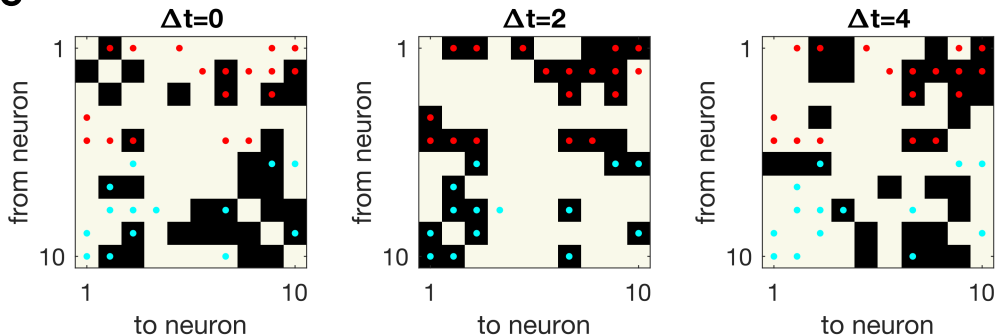

Supplement: supp [file elife-81279-supp-v1.zip]

VAR

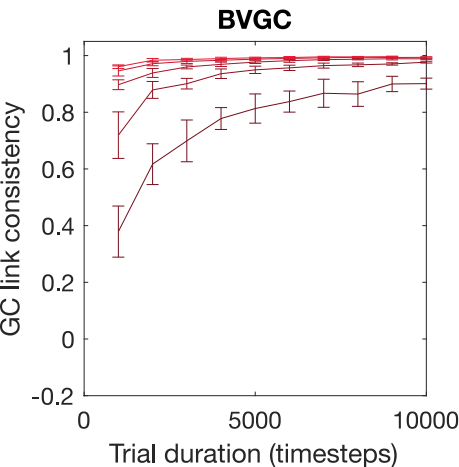

GC link consistency

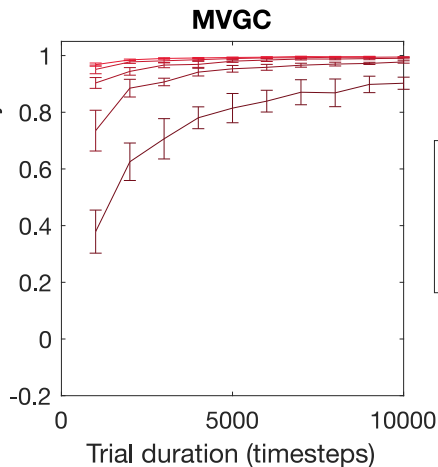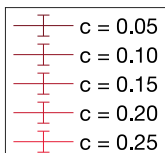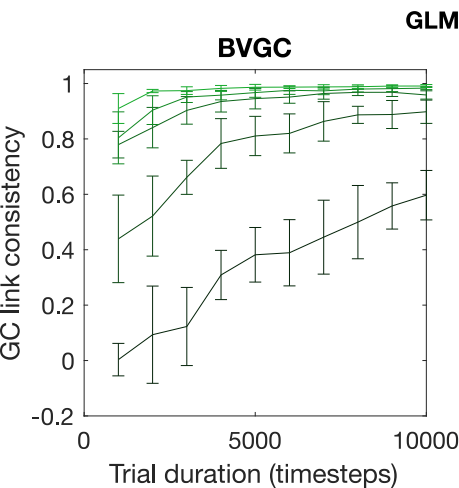

GLM-Calcium

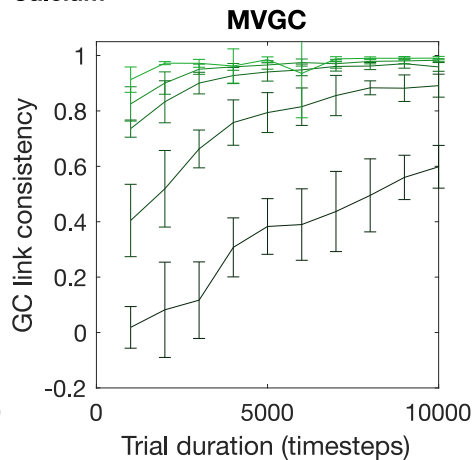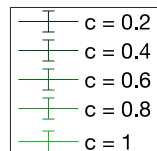

Supplement: supp [file elife-81279-supp-v1.zip]

VAR

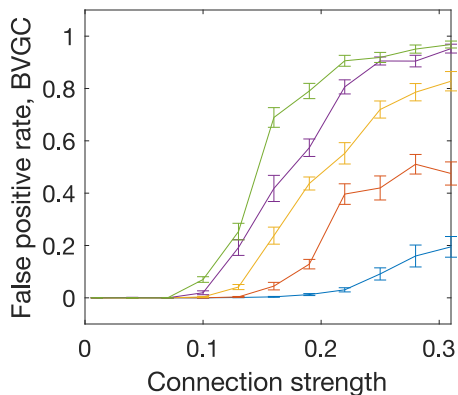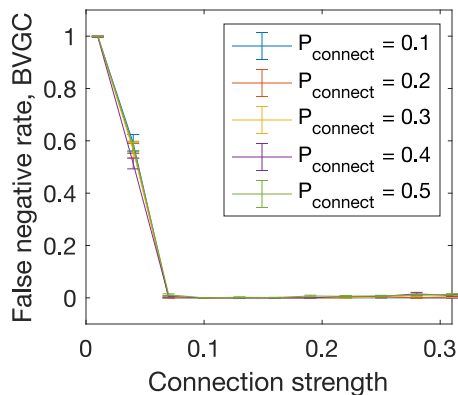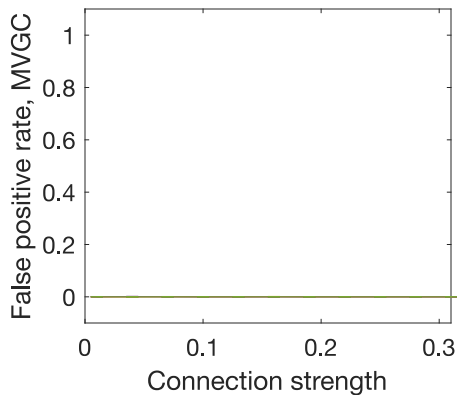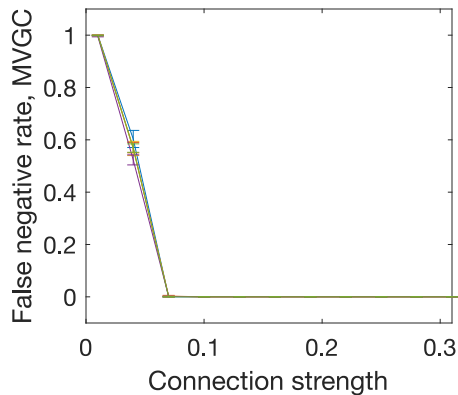

Supplement: supp [file elife-81279-supp-v1.zip]
